# Supplementary material
Source: PubMed Central journal article supplement (PMC4127879)
Supplement: NIHMS610509-supplement-Supplement1.pdf [file NIHMS610509-supplement-Supplement1.pdf]

## Supplementary Appendix

This appendix has been provided by the authors to give readers additional information about their work.

Supplement to: Boulware DR, Meya DB, Muzoora C, et al. Timing of antiretroviral therapy after diagnosis of cryptococcal meningitis. *N Engl J Med* 2014;370:2487-98. DOI: [10.1056/NEJMoa1312884](https://doi.org/10.1056/NEJMoa1312884)

## SUPPLEMENTARY APPENDIX

### **Timing of Antiretroviral Therapy after Diagnosis of Cryptococcal Meningitis.**

David R Boulware, David B Meya, Conrad Muzoora, Melissa A Rolfes, Kathy Huppler Hullsiek, Abdu Musubire, Kabanda Taseera, Henry W Nabeta, Charlotte Schutz, Darlisha A Williams, Radha Rajasingham, Joshua Rhein, Friedrich Thienemann, Melanie W Lo, Kirsten Nielsen, Tracy L Bergemann, Andrew Kambugu, Yukari C Manabe, Edward N. Janoff, Paul R. Bohjanen, Graeme Meintjes, and the COAT Trial Team

#### Authorship Contributions:

DRB, DBM, AK, ENJ, and PRB conceived of the trial. DRB wrote the clinical protocol with statistical assistance from TLB and input from DBM, YCM, and NIAID personnel. TLB and MAR generated the randomization sequence. KHH and MAR conducted statistical analysis, with the analysis being guaranteed by KHH. Site principal investigators were: DBM, CM, and GM. Clinical data were collected in Kampala by AM, HWN, DAW, RR, JR, MWL; in Mbarara by KT; in Cape Town by CS and FT. Microbiology data were collected by CS, KT, and verified by KN. DRB wrote the first draft of the manuscript and is overall study guarantor. All authors reviewed, revised, and approved the final version of the manuscript.

#### Additional COAT Team Members' Contributions:

Provision of Patient Care: Jane Francis Ndyetukira, Cynthia Ahimbisibwe, Florence Kugonza, Liberica Ndyatunga, Busingye Noeme, Brian Memela, Yolisa Sigila, James Scriven, Nicholas Fosslund, Monica Rani, Renee Carlson, Kate Birkenkamp, Elissa Butler  
HIV and ART Counseling: Alisat Sadiq, Monica Magwayi, Busingye Noeme  
Laboratory support: Richard Kwizera, Emily Ninsiima, Ali Elbireer, Robert Lukande  
Microbiology support: Andrew Akampurira, James Mwesigy, Robert Wagubi, Henry Kajumbula, Tami McDonald, Anna Strain, Darin Wiesner, Grace Najjuka, Tihana Bicanic  
Logistical support: Leya Hassanally, Catherine Nanteza, Rhina Mushagara, Maximilian von Hohenberg, Ann Vogt, Darin Wiesner, Grant Botker, Nathan Bahr, Kosuke Yasukawa  
Data Management: Mariam Namaweje, Mark Ssenono, Agnes Kiragga  
Event Adjudication Committee: Tihana Bicanic, Lewis J Haddow, and Jason V Baker

#### Table of Contents

|                    |                                                                                                |   |
|--------------------|------------------------------------------------------------------------------------------------|---|
| <b>Methods</b>     | External Adjudication Committee Procedures                                                     | 2 |
| <b>Figure S1.</b>  | Cumulative Incidence of Cryptococcal Immune Reconstitution Inflammatory Syndrome (IRIS) Events | 3 |
| <b>Figure S2a.</b> | CD4 T cell responses over 26 weeks                                                             | 4 |
| <b>Figure S2b</b>  | HIV viral load responses over 26 weeks                                                         | 5 |
| <b>Figure S3a.</b> | Cumulative Incidence of Adverse Events, Grades 3-5                                             | 6 |
| <b>Figure S3b.</b> | Cumulative Incidence of Adverse Events, Grades 4-5                                             | 7 |
| <b>Table S1.</b>   | Cumulative Listing of Adverse Events, Grades 3-5                                               | 8 |

## **Methods:**

### **External Adjudication Committee Procedures:**

All deaths had a primary cause of death determined, at the time of death, by the COAT study physician(s) attending to the research participant. A panel of three independent clinicians, with expertise in HIV and cryptococcosis, retrospectively adjudicated deaths for agreement. Digital images of the original source documents were provided to the committee for their review. A consensus of 2 of 3 adjudicators was needed for the cause of death. There was 88% agreement between the study physicians and adjudicator committee for cryptococcal-related deaths, and 79% agreement with all causes of death. Disagreements with the original study physician diagnosis of cause of death were most often based on the availability to the committee of all final microbiology and postmortem data (specifically, final postmortem histopathology results); or often subtle differences in the differentiation between the proximal cause of death versus contributory causes of death.

Suspected immune reconstitution inflammatory syndrome (IRIS) events were also adjudicated per the International Network for the Study of HIV-associated IRIS (INSHI) published cryptococcal-IRIS case definition, requiring consensus of all three adjudicators. Any major clinical event or re-hospitalization was adjudicated by the committee. Among the earlier ART arm, 44 major clinical events occurred among 30 subjects. In the deferred ART arm, 45 major clinical events occurred among 24 subjects. IRIS was adjudicated as definite/probable IRIS (n=6 in both arms), possible IRIS (n=11 with earlier ART vs. n=3 with deferred ART), or not cryptococcal-IRIS.

**Figure S1. Cumulative Incidence of Cryptococcal IRIS Events**

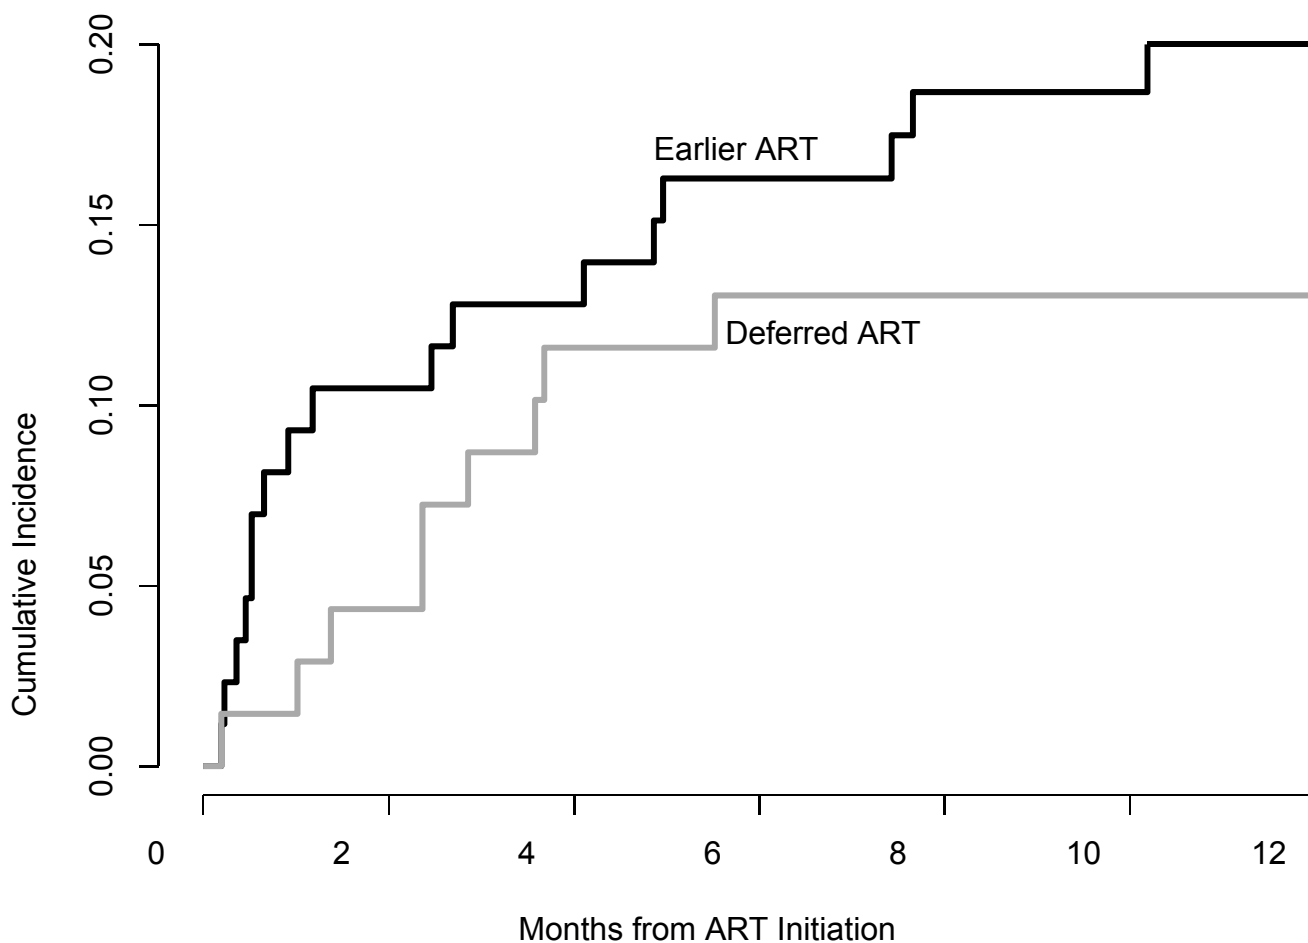

Number at Risk:

|           |    |    |    |    |    |    |
|-----------|----|----|----|----|----|----|
| Earlier:  | 87 | 42 | 38 | 35 | 32 | 29 |
| Deferred: | 69 | 61 | 54 | 53 | 52 | 50 |

Figure S1 displays the cumulative incidence from the time of antiretroviral therapy (ART) initiation to time of first cryptococcal-related paradoxical immune reconstitution inflammatory syndrome (IRIS) as externally adjudicated by a three physician masked panel. Within the COAT trial randomization ART was initiated in the earlier ART group between 7-13 days after cryptococcal meningitis diagnosis and in the deferred ART group at 5  $\pm$  1 week from diagnosis. In total, 17 (20%) IRIS events occurred in the earlier ART arm, and 9 (13%) IRIS events occurred in the deferred ART arm within 46 weeks from randomization. The number at risk indicates those persons alive on ART without an IRIS episode. Persons who never initiated ART are censored from the initial number at risk.

**Figure S2a. CD4 T cell response over 26 weeks**

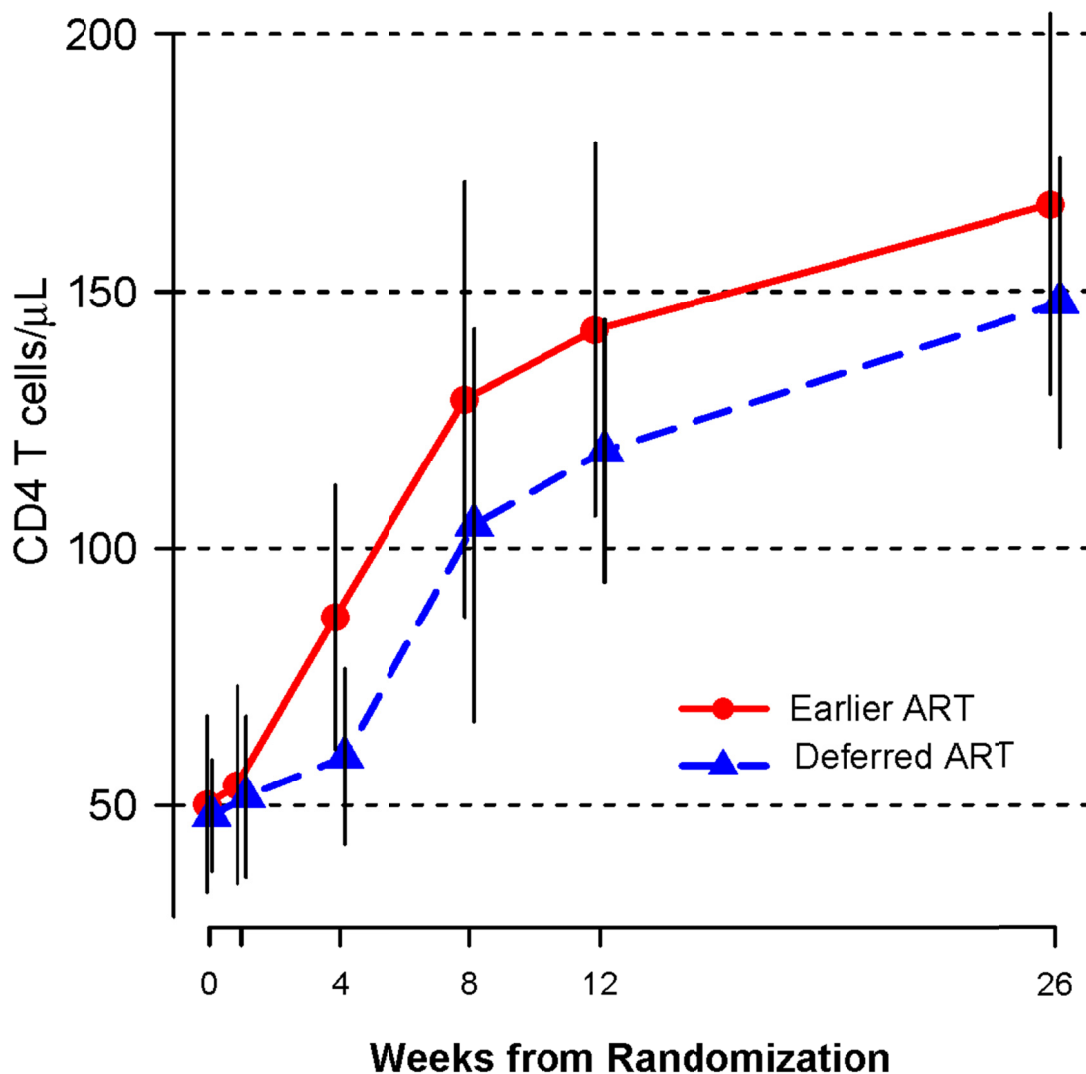

| Number of participants: |    |    |    |    |    |    |
|-------------------------|----|----|----|----|----|----|
| Earlier:                | 87 | 72 | 56 | 49 | 46 | 47 |
| Deferred:               | 88 | 82 | 71 | 65 | 60 | 58 |

Figure S2a displays the mean (95% CI) response in CD4 T cell count/ $\mu\text{L}$  over 26 weeks from randomization by trial arm. Red solid line displays the earlier ART group; Blue dashed line displays the deferred ART group. At 26 weeks, there was no statistical difference in CD4 T cell counts ( $P=0.40$ ).

Randomization occurred at a median of 8 days (IQR, 7-8) of antifungal therapy. Earlier ART was initiated a median of 1 day (IQR, 0-1) after randomization. Deferred ART was initiated a median of 28 days (IQR, 27-31) after randomization (i.e. approximately 5 weeks after cryptococcal meningitis diagnosis).

**Figure S2b. HIV-1 Plasma Viral Load response over 26 weeks**

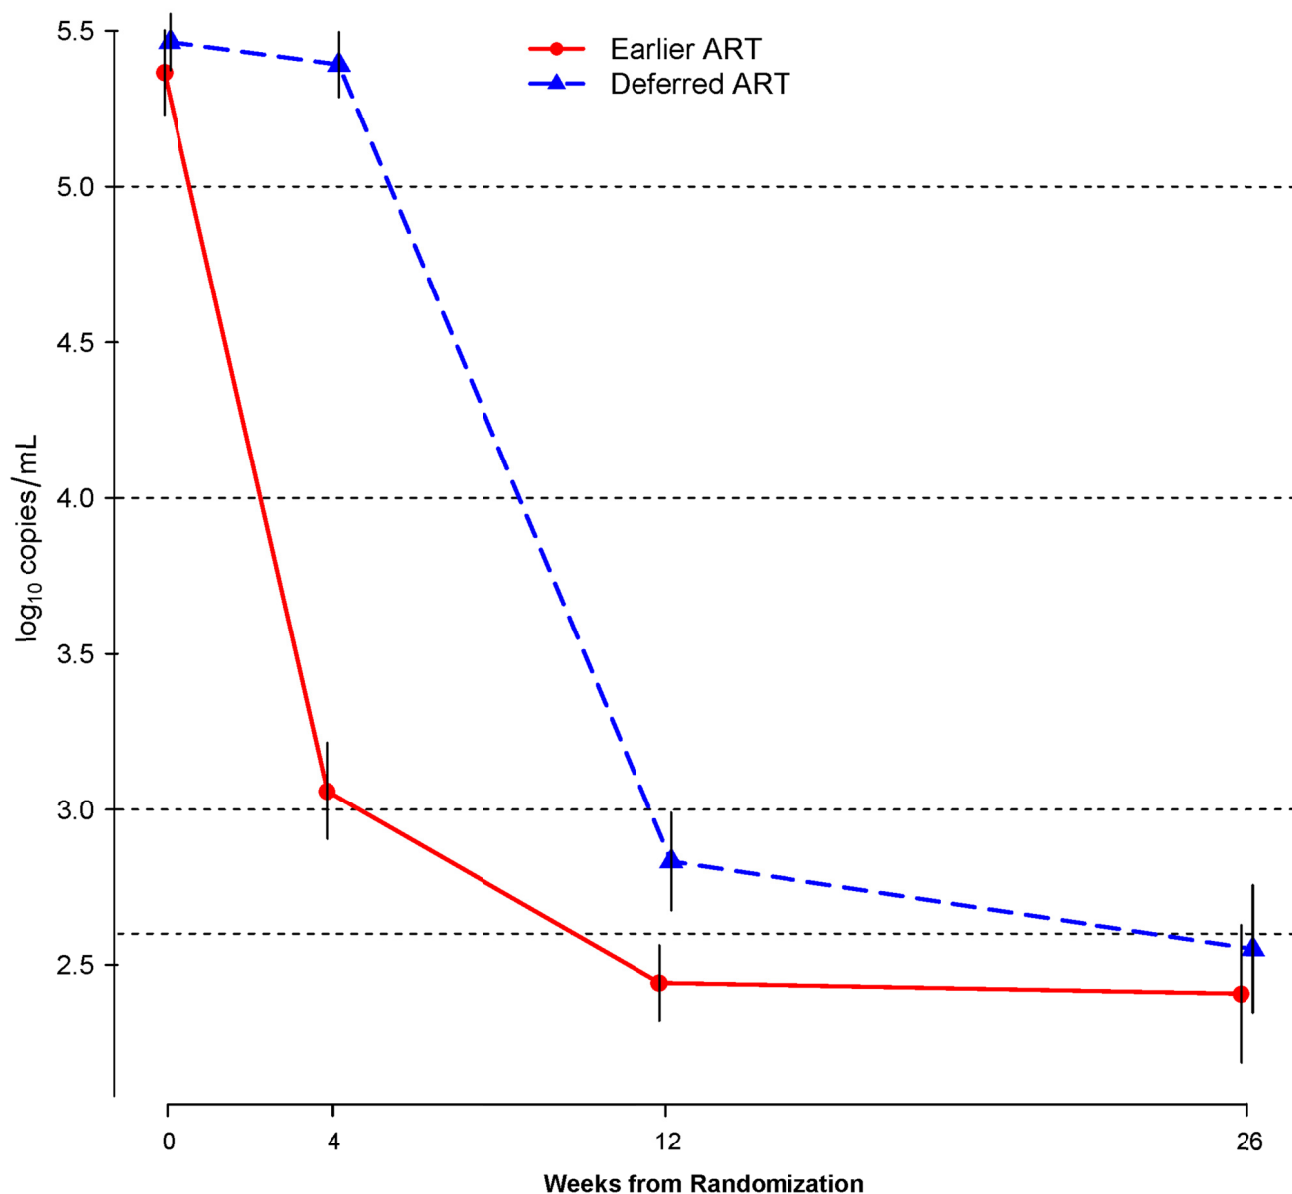

| Number of participants: |    |    |    |
|-------------------------|----|----|----|
| Earlier:                | 88 | 56 | 46 |
| Deferred:               | 87 | 71 | 59 |

Figure S2b displays the mean (95% CI) plasma HIV-1 viral load (log<sub>10</sub> copies/mL) response over 26 weeks from COAT trial randomization. Red solid line displays the earlier ART group; Blue dashed line displays the deferred ART group. At 26 weeks, there was no statistical difference in HIV viral loads (P=0.34). At 26 weeks, 91% (43/47) of the earlier ART group had viral loads <400 copies/mL compared with 84% (49/59) of the deferred ART group (P=0.26). Detectable viral loads between 400-1000 copies/mL occurred in 4.3% (2/47) of the earlier ART group and 10% (6/59) of the deferred ART group. Potential virologic failure with viral loads >1000 copies/mL were present in 4.3% (2/47) of the earlier ART group and 6.8% (4/59) of the deferred ART group. Reported episodes of ART treatment interruption for >3 days did not differ between earlier ART initiation (5.7% (5/87)) and deferred ART initiation (1.4% (1/69); P=0.23).

**Figure S3a. Cumulative Incidence of Grade 3–5 Adverse Events**

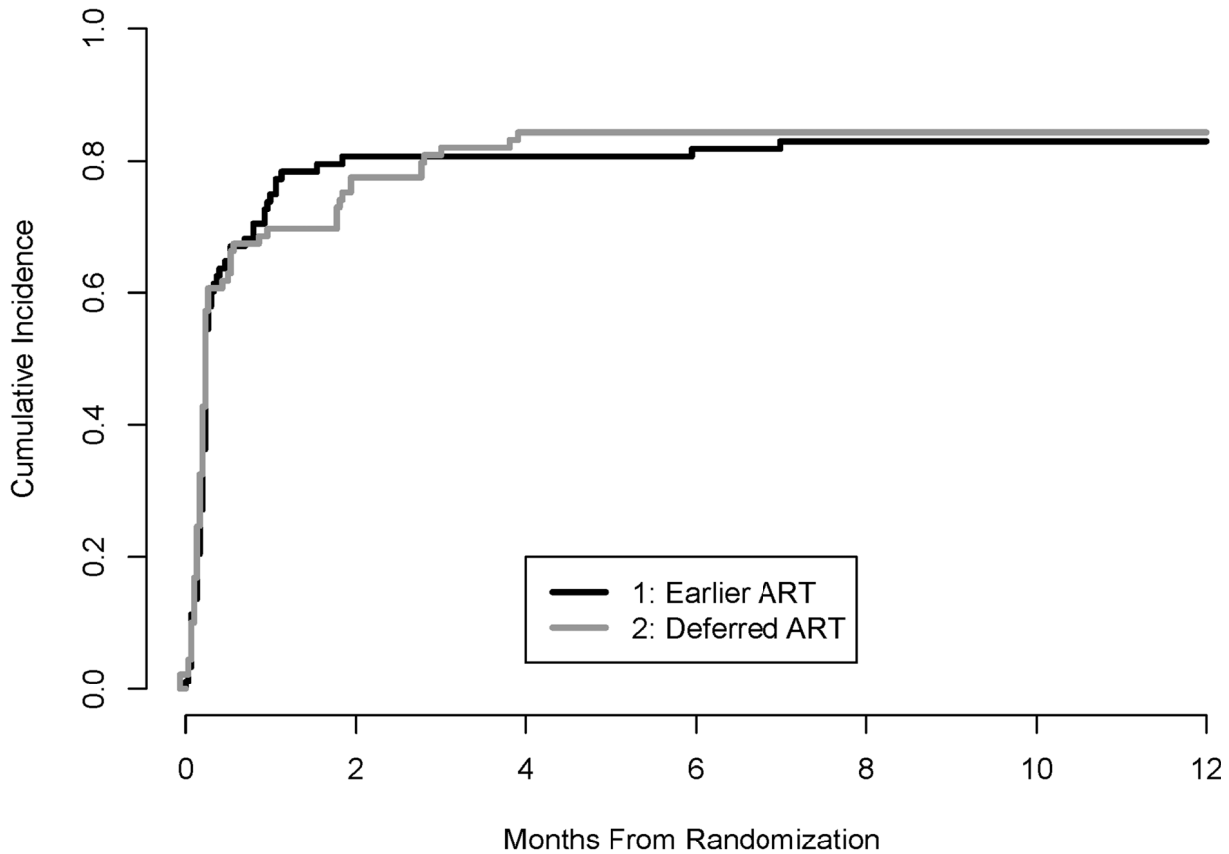

Number at Risk:

|           |    |    |    |    |    |    |
|-----------|----|----|----|----|----|----|
| Earlier:  | 88 | 83 | 72 | 57 | 31 | 26 |
| Deferred: | 89 | 82 | 71 | 57 | 35 | 32 |

Figure S3a displays the time from randomization to a first Grade 3-5 adverse event by trial arm as defined by the National Institute of Allergy and Infectious Diseases (NIAID) Division of AIDS (DAIDS) Toxicity Grading Scale, version 2009. The distribution of adverse events by body system was:

| Distribution by Body System | Earlier ART | Deferred ART |
|-----------------------------|-------------|--------------|
| Hematology                  | 99 (47.8%)  | 128 (55.9%)  |
| Chemistries                 | 65 (31.4%)  | 53 (23.1%)   |
| Infection                   | 13 (6.3%)   | 26 (11.4%)   |
| Neurological                | 11 (5.3%)   | 5 (2.2%)     |
| Gastrointestinal            | 6 (2.9%)    | 8 (3.5%)     |
| Cardiovascular              | 6 (2.9%)    | 5 (2.2%)     |
| Systemic                    | 4 (1.9%)    | 2 (0.9%)     |
| Skin, dermatological        | 2 (1.0%)    | 1 (0.4%)     |
| Respiratory                 | 1 (0.5%)    | 1 (0.4%)     |
| Overall (Number of events)  | 207 (100%)  | 229 (100%)   |

The most common adverse events included anemia (n=88), neutropenia (n=54), leukopenia (n=24), hyponatremia (n=21), hypokalemia (n=23), and elevated creatinine (n=18).

**Figure S3b. Cumulative Incidence of Grade 4 or 5 Adverse Events**

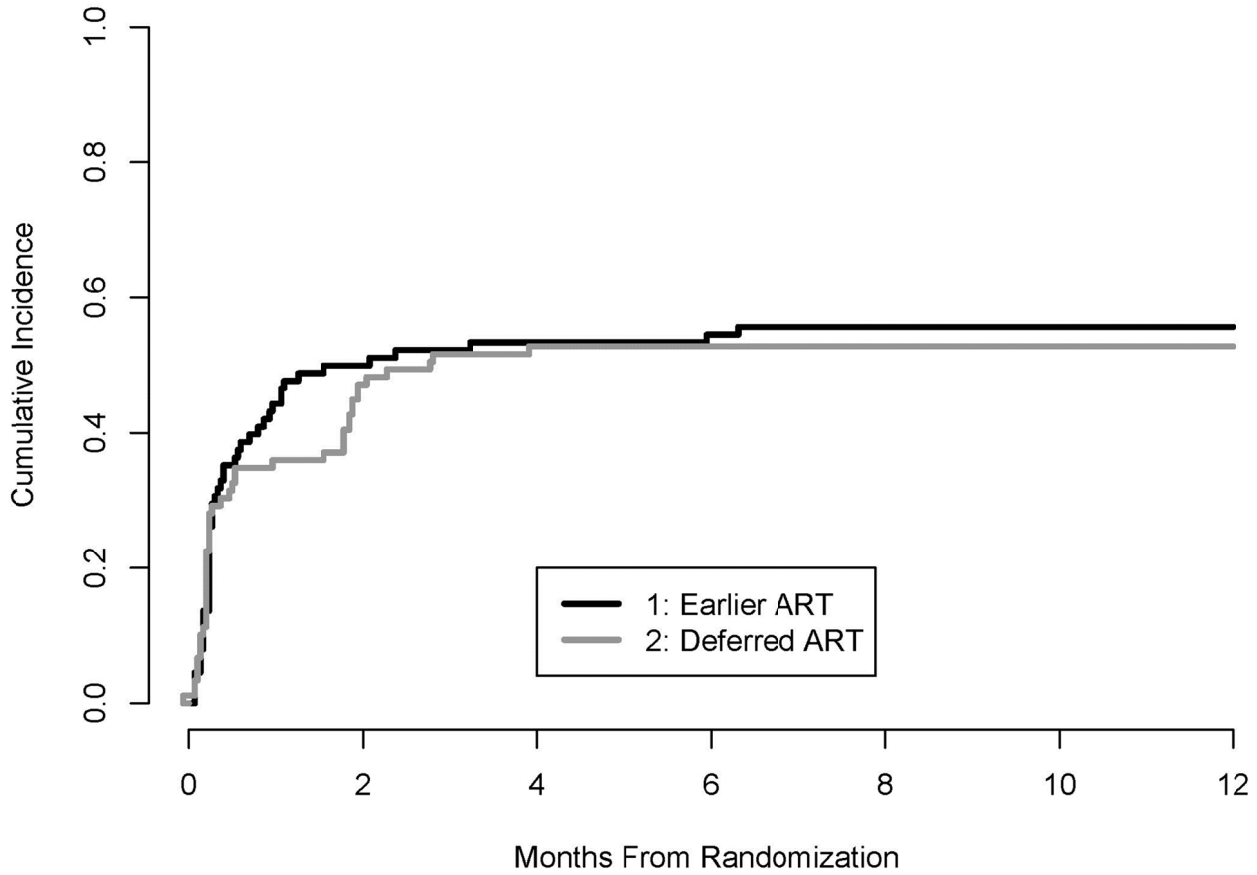

Number at Risk:

|           |    |    |    |    |    |    |
|-----------|----|----|----|----|----|----|
| Earlier:  | 88 | 86 | 80 | 69 | 54 | 49 |
| Deferred: | 89 | 85 | 80 | 76 | 61 | 59 |

Figure S3b displays the time from randomization to a Grade 4 (life threatening) or Grade 5 (death) adverse event by trial arm as defined by the National Institute of Allergy and Infectious Diseases (NIAID) Division of AIDS (DAIDS) Toxicity Grading Scale, version 2009. Grade 5 events occurred in 14 (15.9%) participants randomized to earlier ART and 11 (12.3%) participants randomized to deferred ART. Grade 5 events do not include deaths due to cryptococcal meningitis.



| Table S1: Adverse Event Listing         |                                      | Grade 3-5 Adverse Events |              | Grade 4 and 5 Adverse Events |              |
|-----------------------------------------|--------------------------------------|--------------------------|--------------|------------------------------|--------------|
|                                         |                                      | Earlier ART              | Deferred ART | Earlier ART                  | Deferred ART |
| Body System                             | MedDRA Term                          | Earlier ART              | Deferred ART | Earlier ART                  | Deferred ART |
| Cardiovascular                          | Cardiac arrhythmias                  | 1                        | 0            | 1                            | 0            |
|                                         | DVT                                  | 4                        | 1            | 1                            | 0            |
|                                         | Pulmonary embolus                    | 0                        | 1            | 0                            | 1            |
|                                         | Tachycardia                          | 0                        | 1            | 0                            | 0            |
| Chemistries                             | Alanine aminotransferase increased   | 2                        | 1            | 0                            | 0            |
|                                         | Aspartate aminotransferase increased | 5                        | 4            | 2                            | 1            |
|                                         | Blood alkaline phosphatase increased | 2                        | 0            | 1                            | 0            |
|                                         | Blood bicarbonate decreased          | 6                        | 5            | 1                            | 2            |
|                                         | Blood bilirubin increased            | 1                        | 0            | 0                            | 0            |
|                                         | Blood sodium decreased               | 14                       | 7            | 8                            | 3            |
|                                         | Blood sodium increased               | 0                        | 2            | 0                            | 1            |
|                                         | Hyperkalemia                         | 2                        | 0            | 2                            | 0            |
|                                         | Potassium serum decreased            | 15                       | 8            | 4                            | 1            |
|                                         | Serum creatinine increased           | 8                        | 10           | 2                            | 2            |
| Gastrointestinal                        | Decreased appetite                   | 1                        | 1            | 0                            | 0            |
|                                         | Diarrhea                             | 3                        | 2            | 1                            | 1            |
|                                         | Nausea and vomiting                  | 2                        | 2            | 1                            | 1            |
| Hematology                              | Anemia                               | 41                       | 47           | 23                           | 31           |
|                                         | Leukopenia                           | 11                       | 13           | 6                            | 3            |
|                                         | Neutropenia                          | 23                       | 31           | 12                           | 12           |
|                                         | Thrombocytopenia                     | 4                        | 13           | 1                            | 3            |
| Infection                               | Abdominal pain localized             | 0                        | 1            | 0                            | 0            |
|                                         | <i>Acinetobacter</i> bacteremia      | 0                        | 1            | 0                            | 1            |
|                                         | Acute pneumonia                      | 1                        | 0            | 0                            | 0            |
|                                         | Bronchopneumonia                     | 1                        | 0            | 0                            | 0            |
|                                         | <i>Burkholderia cepacia</i> complex  | 0                        | 1            | 0                            | 0            |
|                                         | Cystitis, <i>Klebsiella</i>          | 1                        | 0            | 1                            | 0            |
|                                         | Disseminated tuberculosis            | 0                        | 2            | 0                            | 2            |
|                                         | <i>Klebsiella</i> sepsis             | 1                        | 1            | 1                            | 1            |
|                                         | Pulmonary tuberculosis               | 0                        | 1            | 0                            | 0            |
|                                         | <i>Salmonella</i> bacteremia         | 0                        | 1            | 0                            | 0            |
|                                         | <i>Salmonella</i> sepsis             | 0                        | 1            | 0                            | 0            |
|                                         | Sepsis                               | 1                        | 4            | 1                            | 3            |
|                                         | Septicemia due to <i>pseudomonas</i> | 1                        | 1            | 1                            | 0            |
| <i>Staphylococcus aureus</i> septicemia | 1                                    | 0                        | 1            | 0                            |              |
| Tuberculosis                            | 0                                    | 1                        | 0            | 1                            |              |
| Neurological                            | Acute mental status changes          | 5                        | 3            | 4                            | 0            |
|                                         | Intracranial pressure increased      | 3                        | 0            | 0                            | 0            |
|                                         | Muscle weakness right-sided          | 2                        | 0            | 2                            | 0            |
|                                         | Sensory neuropathy                   | 1                        | 0            | 0                            | 0            |
| Respiratory                             | Dyspnea                              | 1                        | 1            | 1                            | 0            |
| Dermatological                          | Erythroderma                         | 1                        | 0            | 0                            | 0            |
|                                         | Rash - morbilliform                  | 0                        | 1            | 0                            | 1            |
| Systemic                                | HIV wasting syndrome                 | 0                        | 1            | 0                            | 0            |
|                                         | Pyrexia                              | 1                        | 0            | 0                            | 0            |
